# AUTHOR INDEX TO VOLUME 74

## A

Aaron, Cynthia, *see* Herschman, Zvi  
 Abdel-Latif, Mohamed, *see* Crystal, George J.  
 Abitbol, J.-J., *see* Drummond, John C.  
 Abouleish, Ezzat, Rawal, Narinder, Shaw, James, Lorenz, Tim, Rashad, M. Nabil: Intrathecal Morphine 0.2 mg versus Epidural Bupivacaine 0.125% or Their Combination: Effects on Parturients, 711  
 Abramowicz, A. Elisabeth, Kass, Ira S., Chambers, Geoffrey, Cottrell, James E.: Midazolam Improves Electrophysiologic Recovery after Anoxia and Reduces the Changes in ATP Levels and Calcium Influx during Anoxia in the Rat Hippocampal Slice, 1121  
 Agoston, Sandor: Paralysis after Long-term Administration of Vecuronium, 792  
 Agoston, Sandor, *see* Segredo, Veronica  
 Ahnefeld, Friedrich W., *see* Lindner, Karl H.  
 Aho, Martina, Lehtinen, A.-M., Erkola, O., Kallio, A., Korttila, K.: The Effect of Intravenously Administered Dexmedetomidine on Perioperative Hemodynamics and Isoflurane Requirements in Patients Undergoing Abdominal Hysterectomy, 997  
 Alagesan, Ramdas, *see* Veselis, Robert A.  
 Alberti, K. G. M. M.: Diabetes and Surgery, 209  
 Alifimoff, James K., *see* Coté, Charles J.  
 Ali, Hassan H., Shorten, George: Nerve Stimulation and Residual Neuromuscular Block, 956  
 Andrews, Raymond B., *see* Zaidan, James R.  
 Annat, G., *see* Quintin, L.  
 Antognini, Joseph F., Hanowell, Leland H.: Intraoperative Hypoxemia Complicating Sequential Resection of Bilateral Pulmonary Metastases, 1137  
 Arai, Toshiyuki, *see* Oshima, Eiji  
 Artru, Alan A., *see* Bernards, Christopher M.  
 Artuso, James D., *see* Stevens, Rom A.  
 Atkinson, Richard S., Boulton, Thomas B.: The History of Anaesthesia, 798  
 Atlee, John L., III, *see* Pattison, Christine Z.  
 Audenaert, Steve M.: The Cervical Spines of Dwarfs, 1172  
 Audenaert, Steve M., Vickers, Holly, Burgess, Ronald C.: Axillary Block for Vascular Insufficiency after Repair of Radial Club Hands in an Infant, 368

## B

Baele, Philippe, Housmans, Philippe R.: The Effects of Halothane, Enflurane, and Iso-

flurane on the Length-Tension Relation of the Isolated Ventricular Papillary Muscle of the Ferret, 281  
 Bailey, M. K., *see* Sternberg, T. L.  
 Bailey, Peter L.: Reply, 199  
 Bailey, Peter L., Sperry, Richard J., Johnson, G. Kevin, Eldredge, Stephen J., East, Katharine A., East, Thomas D., Pace, Nathan L., Stanley, Theodore H.: Respiratory Effects of Clonidine Alone and Combined with Morphine, in Humans, 43  
 Bailey, Peter L., *see* Stanley, Theodore H.  
 Baker, Max T., *see* Hansen, Thomas D.  
 Baker, Susan B., *see* Hannallah, Raafat S.  
 Bang, Ulla, *see* Pedersen, Tom  
 Banner, Michael J., *see* Kirby, Robert R.  
 Bannon, Michael G.: Termination of Hiccups Occurring under Anesthesia, 385  
 Baraka, Anis, Nawfal, Maud, Dahdah, Sonia: Difficult Pulmonary Artery Catheterization in the Patient with Tricuspid Regurgitation, 393  
 Barash, Paul G., *see* Gordon, Michael A.  
 Bardoczky, Gizella I., Rausin, Isabelle, Hennart, Danielle, dePauw, Luc: Bronchospasm Following Revascularization of Cadaver Kidney Graft, 200  
 Barnette, Rodger E., *see* Yellin, Lawrence B.  
 Barvais Luc, *see* Baurain, Michel J.  
 Bashein, G., Martin, Roy W.: Transesophageal Echocardiography in Dogs, 958  
 Baum, Victor C., *see* Wong, Robert S.  
 Baurain, Michel J., d'Hollander, Alain A., Melot, Christian, Dernovoi, Boris S., Barvais Luc: Effects of Residual Concentrations of Isoflurane on the Reversal of Vecuronium-induced Neuromuscular Blockade, 474  
 Bedford, Robert F., *see* Veselis, Robert A.  
 Bender, Karen S., *see* Berkowitz, Ivor D.; *also see* Spear, Robert M.  
 Benita, S., *see* Langerman, L.  
 Bentley, John B., Lahet, Bradley S.: Antagonism of Vecuronium-induced Neuromuscular Block, 1169  
 Benumof, Jonathan L., Gaughan, Sheila, Ozaki, George T., Rusk, Ron: Connecting a Jet Stylet to a Jet Injector, 963  
 Berdeaux, Alain, *see* Riou, Bruno  
 Berggren, Margareta, *see* Iaizzo, Paul A.  
 Bergman, Stuart K., Jimenez, J. Francisco: Another Reason for Difficult Pulmonary Artery Catheterization, 962  
 Beriault, Michael: Herpesvirus Infections and Intraspinal Opioids, 199  
 Berkowitz, Ivor D., Raja, Srinivasa N., Bender, Karen S.: Reply, 1173  
 Berkowitz, Ivor D., *see* Spear, Robert M.  
 Berman, Michael, *see* Robotham, James L.  
 Bernard, Jean-Marc, Doursout, Marie-Françoise, Wouters, Patrick, Hartley, Craig J., Cohen, Marvin, Merin, Robert G., Chelly, Jacques E.: Effects of Enflurane and Isoflurane on Hepatic and Renal Circulations in Chronically Instrumented Dogs, 298  
 Bernard, Jean-Marc, *see* Merin, Robert G.  
 Bernards, Christopher M., Artru, Alan A.: Hexamethonium and Midazolam Terminate Dysrhythmias and Hypertension Caused by Intracerebroventricular Bupivacaine in Rabbits, 89  
 Berry, Frederic A.: Anesthetic Management of Difficult and Routine Pediatric Patients. Second Edition, 798  
 Bertrix, Lucien, *see* Timour, Quadiri  
 Beutlich, Fred W.: Reply, 387  
 Bevacqua, Brian K., Slucky, Alexey V.: Epidural Blood Patch in a Patient with HIV Infection, 952  
 Bissonnette, Bruno, *see* Sloan, Mark H.  
 Black, Kimberly W., *see* Prielipp, Richard C.  
 Black, Susan, *see* Konstadt, Steven N.  
 Blackstock, D., *see* Pounder, D. R.  
 Blanchard, M., *see* Borgeat, A.  
 Blanck, Thomas J. J., *see* Drenger, Benjamin  
 Bleuer, Shari A., *see* Vincent, Robert D., Jr.  
 Bodner, Matthew, *see* Ghouri, Ahmed F.  
 Bogen, Daniel K., *see* O'Hara, Dorene A.  
 Bohle, Wolfram, *see* Nöldge, Gabriele F. E.  
 Borgeat, A., Dessibourg, C., Popovic, V., Meier, D., Blanchard, M., Schwander, D.: Propofol and Spontaneous Movements: An EEG Study, 24  
 Bosnjak, Zeljko J., Supan, Franjo D., Rusch, Nancy J.: The Effects of Halothane, Enflurane, and Isoflurane on Calcium Current in Isolated Canine Ventricular Cells, 340  
 Bosnjak, Zeljko J., *see* Eskinder, Hanna; *also see* Gallenberg, Lori A.; *also see* Rooney, Rosemary T.; *also see* Stowe, David F.  
 Boudaoud, S., *see* Jacob, L.  
 Boulton, Thomas B., *see* Atkinson, Richard S.  
 Bourdon, Raymond, *see* Riou, Bruno  
 Bowler, Ingrid M., *see* Lindner, Karl H.  
 Bowie, E. J. Walter, *see* Nuttall, Gregory A.  
 Bradley, Edwin L., Jr., *see* Kissin, Igor  
 Bragg, Cordell L.: Triple Gloves, 631  
 Brahen, N. H., *see* Sternberg, T. L.  
 Branson, Richard D., *see* Tobin, Martin J.  
 Bray, Jack G., *see* Stevens, Rom A.  
 Brichant, Jean-François, Gunst, Susan J., Warner, David O., Rehder, Kai: Halothane, Enflurane, and Isoflurane Depress the Peripheral Vagal Motor Pathway in Isolated Canine Tracheal Smooth Muscle, 325  
 Bridenbaugh, Philip O., *see* Katz, Jeffrey A.  
 Broadman, Lynn M., *see* Hannallah, Raafat S.  
 Brock-Utne, J. G., Haddow, G.: Mechanical Chin Support during Radiotherapy, 381

- Brodsky, Jay B., Tobler, H. Gareth, Mark, James B. D.: A Double-lumen Endobronchial Tube for Tracheostomies, 387
- Brodsky, Jay B., Mark, James B. D.: Bilateral Upper Lobe Obstruction from a Single Double-lumen Tube, 1163
- Brose, William G., *see* Tanelian, Darrell L.
- Brown, Mary, *see* Sprung, Juraj
- Brown, Pamela T., *see* Kissin, Igor
- Brown, Ron, *see* Crisologo, Peter A.
- Bruce, David L.: Recantation Revisited, 1160
- Brull, Sorin J., Connelly, Neil R., O'Connor, Theresa Z., Silverman, David G.: Effect of Tetanus on Subsequent Neuromuscular Monitoring in Patients Receiving Vecuronium, 64
- Bucol, Kevin D., Short, Charles D.: Transfusion-induced Hyperkalemia, 1168
- Buljubasic, Nediljka, *see* Pattison, Christine Z.
- Burgess, Ronald C., *see* Audenaert, Steve M.
- Burm, Anton G. L., *see* Veering, Bernadette T.
- Bussery, D., *see* Quintin, L.
- Butin, E., *see* Quintin, L.
- Butterworth, John F., IV, *see* Prielipp, Richard C.
- Buttler, Klaus Jürgen, *see* Nöldge, Gabriele F. E.

C

- Cahalán, Michael K., *see* Muhiudeen, Isobel A.; *also see* Rampil, Ira J.
- Cahen, Claude R.: An Aid in Cases of Difficult Tracheal Intubation, 197
- Caldwell, James, *see* Magorian, Toni T.
- Caldwell, James E., Laster, Michael J., Magorian, Toni, Heier, Tom, Yasuda, Nobuhiko, Lynam, Daniel P., Eger, Edmond I., II, Weiskopf, Richard B.: The Neuromuscular Effects of Desflurane, Alone and Combined with Pancuronium or Succinylcholine in Humans, 412
- Caldwell, James E., *see* Heier, Tom; *also see* Segredo, Veronica
- Campbell, James N., *see* Raja, Srinivasa N.
- Camporesi, Enrico M., *see* Mangar, Devanand
- Canessa, Roberto, *see* Lema, Guillermo
- Canet, Jaume, Ricos, Monserrat, Vidal, Fernando: Postanesthetic Hypoxemia and Oxygen Administration, 1161
- Capan, Levon M., *see* Sommer, Richard M.
- Caplan, Robert A., *see* Chadwick, H. S.
- Carton, Edmund G., *see* Cook, David J.
- Casey, William, *see* Hannallah, Raafat S.
- Cason, Brian A., *see* Leung, Jacqueline M.
- Castella, Xavier, Gilabert, Jaume, Perez, Concepcion: Arytenoid Dislocation after Tracheal Intubation: An Unusual Cause of Acute Respiratory Failure?, 613
- Certo, Natalie, *see* Goldstein-Dresner, Michelle C.
- Chabal, Charles, Jacobson, Louis, Schwid, Howard A.: An Objective Comparison of Intrathecal Lidocaine versus Fentanyl for the Treatment of Lower Extremity Spasticity, 643
- Chabal, Charles, Schwid, Howard A., Jacobson, Louis: The Dynamic Flexometer: An Instrument for the Objective Evaluation of Spasticity, 609
- Chadwick, H. S., Posner, Karen, Caplan, Robert A., Ward, Richard J., Cheney, Frederick W.: A Comparison of Obstetric and Nonobstetric Anesthesia Malpractice Claims, 242
- Chambers, Geoffrey, *see* Abramowicz, A. Elisabeth
- Chapman, Dennis E., *see* Iaizzo, Paul A.
- Chelly, Jacques E., *see* Bernard, Jean-Marc; *also see* Merin, Robert G.
- Cheney, Frederick W.: Reply, 962
- Cheney, Frederick W., *see* Chadwick, H. S.
- Chestnut, David H.: Epidural Anesthesia and Instrumental Vaginal Delivery, 805
- Chestnut, David H., *see* Vincent, Robert D., Jr.
- Chetham, Paul M., *see* Mark, Jonathan B.
- Christenson, James C., Presson, R. G., Jr.: Insufflation Anesthesia for Suture Removal after Cheiloplasty, 382
- Cirillo, Raffaele, *see* Stellato, Christiana
- Cohen, Marvin, *see* Bernard, Jean-Marc; *also see* Merin, Robert G.
- Cohen, Yoram, *see* Lockhart, Stephen H.
- Collins, J. G., *see* Iwasaki, Hiroshi; *also see* Omote, Keiichi
- Conley, Stephen F., *see* Sprung, Juraj
- Conly, John, *see* Crone, Lesley-Ann
- Connelly, Neil R., *see* Brull, Sorin J.
- Contardi, LeeAnne H., *see* Ho, Anthony M.-H.
- Cook, David J., Carton, Edmund G., Housmans, Philippe R.: Mechanism of the Positive Inotropic Effect of Ketamine in Isolated Ferret Ventricular Papillary Muscle, 880
- Cook, D. Ryan, *see* Goldstein-Dresner, Michelle C.
- Cooke, James E., *see* Scott, James C.
- Coté, Charles J., Rolf, Norbert, Liu, Letty M. P., Goudsouzian, Nishan G., Ryan, John F., Zaslavsky, Alan, Gore, Ronald, Todres, I. David, Vassallo, Susan, Polaner, David, Alifimoff, James K.: A Single-blind Study of Combined Pulse Oximetry and Capnography in Children, 980
- Cottet-Emard, J. M., *see* Quintin, L.
- Cottrell, James E., *see* Abramowicz, A. Elisabeth
- Courtney, Kenneth R., *see* Kendig, Joan J.
- Couzou, Pascale, *see* Timour, Quadiri
- Crisologo, Peter A., Neal, Blake, Brown, Ron, McDanal, Judy, Kissin, Igor: Lidocaine-induced Spinal Block Can Relieve Central Poststroke Pain: Role of the Block in Chronic Pain Diagnosis, 184
- Crisologo, Peter A. *See* Kissin, Igor
- Crone, Lesley-Ann, Conly, John, Zbitnew, Audrey: Reply, 200
- Cryer, Philip E., *see* Hirsch, Irl B.
- Crystal, George J., Kim, Song-Jung, Czinn, Edward A., Salem, M. Ramez, Mason, William R., Abdel-Latif, Mohamed: Intracoronary Isoflurane Causes Marked Vasodilation in Canine Hearts, 757
- Cucchiara, Roy F., *see* Losasso, Thomas J.
- Cucchiara, Roy F., *see* Muzzi, Donald A.
- Cujec, B., *see* Johnson, D.
- Cutkomp, Johann, *see* Hindman, Bradley J.
- Czinn, Edward A., *see* Crystal, George J.

D

- Dahdah, Sonia, *see* Baraka, Anis
- Damask, Michael C., *see* Rampil, Ira J.
- D'Ambra, Michael N., *see* Philbin, Daniel M.
- D'Andrea, Luca, *see* Gattinoni, Luciano
- Datta, Sanjay, *see* Schneider, Markus
- Dauber, Martin: Delayed Onset of Pneumothorax Following Internal Jugular Vein Cannulation, 201
- Davis, Karen D., *see* Raja, Srinivasa N.
- Davis, Peter J., *see* Goldstein-Dresner, Michelle C.
- Davy, Humphrey, *see* Sherry, Eoin
- Day, Franklin J.: Value of Spinal Block in Central Pain, 1167
- DeBruyn, Craig S., *see* Vincent, Robert D., Jr.
- Delaney, Wendy A., Kaiser, Roger E., Jr.: Percutaneous Transtracheal Jet Ventilation Made Easy, 952
- deLeon-Casasola, Oscar A., Lema, Mark J.: Epidural Opioid Requirements, 1158
- deLisser, E. A., *see* VanDercar, D. H.
- dePaulis, Amato, *see* Stellato, Christiana
- dePauw, Luc, *see* Bardoczky, Gizella I.
- Derbyshire, Garrett J., *see* O'Hara, Dorene A.
- Dernovoi, Boris S., *see* Baurain, Michel J.
- Derr, Janice A., *see* Gibbs, Neville M.
- Dershwitz, Mark, Rosow, Carl E., DiBiase, Patricia M., Zaslavsky, Alan: Comparison of the Sedative Effects of Butorphanol and Midazolam, 717
- Desmonts, Jean-Marie, *see* Marty, Jean
- Dessibourg, C., *see* Borgeat, A.
- DeVera, H. V., Ries, Marianne: Complication of Continuous Spinal Microcatheters: Should We Seek Their Removal If Sheared?, 794
- Devlieger, Hugo, *see* Vertommen, Jan D.
- Dewan, David M., *see* Eisenach, James C.
- d'Hollander, Alain A., *see* Baurain, Michel J.

- Diakun, Thomas A.: Carbon Dioxide Embolism: Successful Resuscitation with Cardiopulmonary Bypass, 1151
- DiBiase, Patricia M., *see* Dershwitz, Mark
- Dohi, Shuji, *see* Nishikawa, Toshiaki
- Donati, François, Meistelman, Claude, Plaud, Benoît: Vecuronium Neuromuscular Blockade at the Adductor Muscles of the Larynx and Adductor Pollicis, 833
- Donati, François, Plaud, Benoît, Meistelman, Claude: A Method to Measure Elicited Contraction of Laryngeal Adductor Muscles during Anesthesia, 827
- Donica, Steve, *see* Swygert, Tom
- Doursout, Marie-Françoise, *see* Bernard, Jean-Marc
- Doursout, Marie-Françoise, *see* Merin, Robert G.
- Downs, Gregory J., Haley, Peter R., Parent, Jaime B.: Propofol: Can a Single Ampule Be Used for Multiple Patients?, 1156
- Downs, John B., *see* Kirby, Robert R.
- Drasner, Kenneth, *see* Miller, Anthony C.
- Drenger, Benjamin, Quigg, Mary, Blanck, Thomas J. J.: Volatile Anesthetics Depress Calcium Channel Blocker Binding to Bovine Cardiac Sarcolemma, 155
- Drummond, John C., Abitbol, J.-J., Sanford, T. J., Garfin, S. R.: Transient Paraplegia during Posterior Cervical Osteotomy, 628
- Drummond, John C., *see* Miller, Lawrence R.
- Dudas, L. M., *see* Robertie, P. G.
- Dudas, Louise M., *see* Prielipp, Richard C.
- Dueck, Ronald, Prutow, Richard, Richman, Douglas: Effect of Parainfluenza Infection on Gas Exchange and FRC Response to Anesthesia in Sheep, 1044
- Dugan, Thomas J.: Compatibility between Nellcor® Pulse Oximeter Probe and Puritan-Bennett Surgical Monitor, 197
- Duncan, Steven R., *see* Segal, Ira S.
- Dunn, Karen, *see* Wong, Hak Yui
- Dwyer, Rory C., *see* Rampil, Ira J.

## E

- Eames, J. Sandy: Reply, 967
- East, Katherine A., *see* Bailey, Peter L.
- Eastley, R., *see* Wilson, I. G.
- East, Thomas D., *see* Bailey, Peter L.
- Eckhart, Joanne, *see* Walbergh, Eric J.
- Eger, Edmond I., II, *see* Caldwell, James E.; *also see* Fassoulaki, Argyro; *also see* Lockhart, Stephen H.; *also see* Rampil, Ira J.; *also see* Yasuda, Nobuhiko
- Ehlers, Kevin C., Grabenbauer, Stephen A.: Erroneous Blood Pressure Measurements with a Noninvasive Blood Pressure Monitor, 967
- Eichinger, Hans M., *see* Iazzo, Paul A.

- Eisenach, James C., Mandell, Gordon, Dewan, David M.: Maternal and Fetal Effects of Labetalol in Pregnant Ewes, 292
- Eisenach, James C., Tong, Chuanyao: Site of Hemodynamic Effects of Intrathecal  $\alpha_2$ -Adrenergic Agonists, 766
- Eisenach, James C., *see* Zaloga, Gary
- Eisert, Albert, *see* Kress, Hans G.
- Eldredge, Stephen J., *see* Bailey, Peter L.
- Ellis, D. Jill, Reisner, Laurence S.: Reply, 795
- Ellis, Jay S., Jr., *see* Romanoff, Mark E.
- Engbæk, Jens, *see* Pedersen, Tom
- Eng, Calvin C., *see* Williams, E. Lynne
- Engstrom, Ray H., *see* Siegel, Lawrence C.
- Entress, Jeffrey J., *see* Pattison, Christine Z.
- Epstein, Burton, *see* McGrath, Brian J.
- Erkola, O., *see* Aho, Martina
- Eskinder, Hanna, Rusch, Nancy J., Supan, Franjo D., Kampine, John P., Bosnjak, Zeljko J.: The Effects of Volatile Anesthetics on L- and T-type Calcium Channel Currents in Canine Cardiac Purkinje Cells, 919
- Espinoza-Delgado, Igor, *see* Rudnick, Steven
- Eurin, B., *see* Jacob, L.

## F

- Fassoulaki, Argyro, Lockhart, Stephen H., Freire, Beth A., Yasuda, Nobuhiko, Eger, Edmond I., II, Weiskopf, Richard B., Johnson, Brynte H.: Percutaneous Loss of Desflurane, Isoflurane, and Halothane in Humans, 479
- Fassoulaki, Argyro, *see* Yasuda, Nobuhiko
- Faucon, Georges, *see* Timour, Quadiri
- Fiddler, Daniel S., Hindman, Bradley J.: Intravenous Calcitonin Alleviates Spinal Anesthesia-induced Phantom Limb Pain, 187
- Filler, Joseph J., *see* Yellin, Lawrence B.
- Fink, Robert, *see* Welborn, Leila G.
- Fisher, Kyle S.: Hassle-free Prevention of Blood Spillage during Intravenous Catheter Placement, 202
- Fitzgerald, David C., *see* Siegel, Lawrence C.
- Foult, Jean-Marc, *see* Marty, Jean
- Fox, J. L., *see* Nigrovic, V.
- Fragen, Robert J., *see* Wong, Hak Yui
- Frankville, David D., Harper, G. Britton, Lake, Carol L., Johns, Roger A.: Hemodynamic Consequences of Desmopressin Administration after Cardiopulmonary Bypass, 988
- Freeman, Lisa C., Li, Qian: Effects of Halothane on Delayed Afterdepolarization and Calcium Transients in Dog Ventricular Myocytes Exposed to Isoproterenol, 146
- Freire, Beth, *see* Lockhart, Stephen H.
- Freire, Beth A., *see* Fassoulaki, Argyro; *also see* Yasuda, Nobuhiko

- Freysz, Marc, *see* Timour, Quadiri
- Fujiwara, Yoshihiro, *see* Kainuma, Motoshi
- Funatsu, Naohiko, *see* Hindman, Bradley J.

## G

- Gallenberg, Lori A., Stowe, David F., Marijic, Jure, Kampine, John P., Bosnjak, Zeljko J.: Depression of Atrial Rate, Atrioventricular Nodal Conduction, and Cardiac Contraction by Diltiazem and Volatile Anesthetics in Isolated Hearts, 519
- Ganz, W., *see* Robertie, P. G.
- Garden, Jerome M., *see* Palmieri, John
- Garfin, S. R., *see* Drummond, John C.
- Gattinoni, Luciano, Pelosi, Paolo, Vitale, Giovanni, Pesenti, Antonio, D'Andrea, Luca, Mascheroni, Daniele: Body Position Changes Redistribute Lung Computed-Tomographic Density in Patients with Acute Respiratory Failure, 15
- Gaughan, Sheila, *see* Benumof, Jonathan L.
- Geiger, Klaus, *see* Nöldge, Gabriele F. E.
- Gérard, Jean-Louis, *see* Riou, Bruno
- Ghouri, Ahmed F., Bodner, Matthew, White, Paul F.: Recovery Profile after Desflurane-Nitrous Oxide Versus Isoflurane-Nitrous Oxide in Outpatients, 419
- Gibbons, James J.: Post-dural Puncture Headache in the HIV-positive Patient, 953
- Gibbs, Neville M., Larach, David R., Derr, Janice A.: The Accuracy of Finapres® Noninvasive Mean Arterial Pressure Measurements in Anesthetized Patients, 647
- Gilbert, Jaume, *see* Castella, Xavier
- Gilbert, Timothy B., *see* Morales, George A.
- Gilge, Ulrich, *see* Kress, Hans G.
- Giudicelli, Jean-François, *see* Riou, Bruno
- Glass, D. D., *see* Yeager, M. P.
- Glosten, Beth, *see* Hynson, James M.
- Goehner, Paul, *see* Leung, Jacqueline M.
- Goldman, Donald B., *see* Steinbrook, Richard A.
- Goldstein-Dresner, Michelle C., Davis, Peter J., Kretchman, Ellen, Siewers, Ralph D., Certo, Natalie, Cook, D. Ryan: Double-blind Comparison of Oral Transmucosal Fentanyl Citrate with Oral Meperidine, Diazepam, and Atropine as Preanesthetic Medication in Children with Congenital Heart Disease, 28
- Golomb, E., *see* Langerman, L.
- Gonzalez, Rene M., *see* Green, James M.
- Goodale, David B.: Reply, 1156
- Goodie, David, Traill, Roger: Intraoperative Subdural Tension Pneumocephalus Arising after Opening of the Dura, 193
- Gordon, Michael A., Urban, Michael K., O'Connor, Theresa, Barash, Paul G.: Is the Pressure Rate Quotient a Predictor or Indicator of Myocardial Ischemia as Measured

- by ST Segment Changes in Patients Undergoing Coronary Artery Bypass Surgery?, 848
- Gore, Ronald, *see* Coté, Charles J.
- Gossot, D., *see* Jacob, L.
- Goto, Hiroshi, *see* Taneyama, Chikuni
- Goto, Ryokichi, *see* Mikawa, Katsuya
- Goudsouzian, Nishan G., *see* Coté, Charles J.
- Gould, Daniel B.: Standard Dose of Conduction Anesthetic Is Excessive for the Patient with Uremia, 634
- Grabenbauer, Stephen A., *see* Ehlers, Kevin C.
- Gravelee, Glenn P., *see* Rogers, Anne T.
- Green, James M., Sonbolian, Nasser, Gonzalez, Rene M., Larson, Christopher E., Rehkopf, Paul: CO<sub>2</sub> Laser Resistance of Various Ointments and Tapes, 964
- Gronert, Brian J., Reitan, John A.: Ballistocardiography Complicating Tympanoplasty, 1166
- Gruenke, Larry D., *see* Segredo, Veronica
- Grum, Daniel F.: Reply, 1158
- Grum, Daniel F., Osborne, LeRoy R.: Central Anticholinergic Syndrome Following Glycopyrrolate, 191
- Gudman, Jonathan T.: A Method to Prevent Tampering with an Infusion Pump, 1159
- Gunst, Susan J., *see* Brichant, Jean-François
- Gunzenhauser, Leslie, *see* Katz, Jeffrey A.

H

- Haddow, G., *see* Brock-Utne, J. G.
- Haley, Peter R., *see* Downs, Gregory J.
- Hall, Richard I., *see* Schweiger, Ian M.
- Hall, Steven C., *see* Rudnick, Steven
- Hannallah, Raafat S., Baker, Susan B., Casey, William, McGill, Willis A., Broadman, Lynn M., Norden, Janet M.: Propofol: Effective Dose and Induction Characteristics in Unpremedicated Children, 217
- Hannallah, Raafat S., *see* Welborn, Leila G.
- Hanowell, Leland H., *see* Antognini, Joseph F.
- Hansdottir, Vigdis, Hedner, Thomas, Woestenborghs, Robert, Nordberg, Gunnar: The CSF and Plasma Pharmacokinetics of Sufentanil after Intrathecal Administration, 264
- Hansen, Thomas D., Warner, David S., Todd, Michael M., Baker, Max T., Jensen, Niels F.: The Influence of Inhalational Anesthetics on In Vivo and In Vitro Benzodiazepine Receptor Binding in the Rat Cerebral Cortex, 97
- Harasawa, Yasuhiko, *see* Robotham, James L.
- Harbut, Ronald E., *see* Sosis, Mitchel B.
- Harless, Dean M., *see* Zaidan, James R.
- Harms, Bruce A., *see* Jameson, Leslie C.
- Harper, G. Britton, *see* Frankville, David D.

- Harrington, Jeanette, *see* Hindman, Bradley J.
- Hartley, Craig J., *see* Bernard, Jean-Marc
- Hartman, J. Craig, Kampine, John P., Schmeling, William T., Warltier, David C.: Alterations in Collateral Blood Flow Produced by Isoflurane in a Chronically Instrumented Canine Model of Multivessel Coronary Artery Disease, 120
- Hartman, J. Craig, Kampine, John P., Schmeling, William T., Warltier, David C.: Steal-prone Coronary Circulation in Chronically Instrumented Dogs: Isoflurane versus Adenosine, 744
- Hayashi, Yukio, Sumikawa, Koji, Yamatodani, Atsusi, Kamibayashi, Takahiko, Kuro, Masakazu, Yoshiya, Ikuto: Myocardial Epinephrine Sensitization with Subanesthetic Concentrations of Halothane in Dogs, 134
- Haynsworth, Robert F., Jr., Noe, Carl E.: Percutaneous Lumbar Sympathectomy: A Comparison of Radiofrequency Denervation Versus Phenol Neurolysis, 459
- Haynsworth, Robert F., Jr., *see* Noe, Carl E.
- Hedner, Thomas, *see* Hansdottir, Vigdis
- Heier, Tom, Caldwell, James E., Sessler, Daniel I., Miller, Ronald D.: Mild Intraoperative Hypothermia Increases Duration of Action and Spontaneous Recovery of Vecuronium Blockade during Nitrous Oxide-Isoflurane Anesthesia in Humans, 815
- Heier, Tom, *see* Caldwell, James E.
- Heino, Riitta, *see* Veselis, Robert A.
- Helfaer, Mark A.: Anesthesia for Plastic and Reconstructive Surgery, 1176
- Hellyer, Peter W., Kruse-Elliott, Kris, Meyer, Robert E., Swanson, Clifford R.: Postoperative Analgesia in Animals, 202
- Hendley, B. J.: Transdermal Scopolamine and Postoperative Nausea and Vomiting, 198
- Hennart, Danielle, *see* Bardoczky, Gizella I.
- Herschman, Zvi, Aaron, Cynthia: Prolongation of Cocaine Effect, 631
- Hershey, M., *see* Yemen, T. A.
- Hickey, Rosemary, Hoffman, Joan, Ramamurthy, Somayaji: A Comparison of Ropivacaine 0.5% and Bupivacaine 0.5% for Brachial Plexus Block, 639
- Hindman, Bradley J., Funatsu, Naohiko, Harrington, Jeanette, Cutkomp, Johann, Miller, Tim, Todd, Michael M., Tinker, John H.: Differences in Cerebral Blood Flow between Alpha-stat and pH-stat Management Are Eliminated during Periods of Decreased Systemic Flow and Pressure: A Study during Cardiopulmonary Bypass in Rabbits, 1096
- Hindman, Bradley J., *see* Fiddler, Daniel S.; *also see* Todd, Michael M.
- Hirsch, Irl B., McGill, Janet B., Cryer, Philip E., White, Paul F.: Perioperative Management of Surgical Patients with Diabetes Mellitus, 346
- Hirshman, Carol A., *see* Jacoby, David B.; *also see* Tobias, Joseph D.
- Ho, Anthony M.-H., Contardi, LeeAnne H.: A Modified Y-type Set for Efficient Blood Transfusion, 203
- Hoehn, J. P., *see* Quintin, L.
- Hoffman, Joan, *see* Hickey, Rosemary
- Hogue, Charles W., Jr., *see* Raines, Douglas E.
- Hogue, C. W., Jr., *see* Martyn, J. A. J.
- Hoka, Sumio: Does Arterial Baroreflex Play a Role in Response to Acute Hypovolemia during Induced Hypotension?, 953
- Holder, Donovan O., *see* Mangar, Devanand
- Hollenberg, Milton, *see* Leung, Jacqueline M.
- Hornbein, Thomas F.: The 28th Rovenstine Lecture: Lessons from on High, 772
- Housmans, Philippe R., *see* Baele, Philippe; *also see* Cook, David J.
- Hsia, Judith, *see* McGrath, Brian J.
- Hug, Carl C., Jr.: Reply, 390
- Hug, Carl C., Jr., *see* Schweiger, Ian M.
- Hurfurd, William E., Lynch, Karen E., Strauss, H. William, Lowenstein, Edward, Zapol, Warren M.: Myocardial Perfusion as Assessed by Thallium-201 Scintigraphy during the Discontinuation of Mechanical Ventilation in Ventilator-dependent Patients, 1007
- Hurst, T., *see* Johnson, D.
- Hynson, James, *see* Sessler, Daniel I.
- Hynson, James M., Sessler, Daniel I., Glosten, Beth, McGuire, Joseph: Thermal Balance and Tremor Patterns during Epidural Anesthesia, 680

I

- Iaizzo, Paul A., Seewald, Markus J., Olsen, Richard, Wedel, Denise J., Chapman, Dennis E., Berggren, Margareta, Eichinger, Hans M., Powis, Garth: Enhanced Mobilization of Intracellular Ca<sup>2+</sup> Induced by Halothane in Hepatocytes Isolated from Swine Susceptible to Malignant Hyperthermia, 531
- Iaizzo, Paul A., *see* Wedel, Denise J.
- Inoue, Yoshitaka, *see* Tanigawa, Koichi
- Iwasaki, Hiroshi, Collins, J. G., Saito, Yoji, Kerman-Hinds, Ann: Naloxone-sensitive, Pregnancy-induced Changes in Behavioral Responses to Colorectal Distention: Pregnancy-induced Analgesia to Visceral Stimulation, 927
- Iwata, Sadayuki, *see* Tanigawa, Koichi

J

- Jackson, Kyle E., Rauck, Richard L.: Suspected Venous Air Embolism during Epidural Anesthesia, 190

Jacob, L., Boudaoud, S., Payen, D., Rabary, O., Sarfati, E., Gossot, D., Villiers, S., Eurin, B.: Isoflurane, and Not Halothane, Increases Mesenteric Blood Flow Supplying Esophageal Ileocoloplasty, 699

Jacobson, Louis, *see* Chabal, Charles

Jacoby, David B., Hirshman, Carol A.: General Anesthesia in Patients with Viral Respiratory Infections: An Unsound Sleep?, 969

Jameson, Leslie C., Popic, Peter M., Harms, Bruce A.: Reply, 1169

Jarvis, David J., *see* Segal, Ira S.

Jassy, Loren J.: Getting the Bugs Out, 392

Jellish, W. Scott, *see* Williams, E. Lynne

Jensen, Erik, *see* Pedersen, Tom

Jensen, Niels F., *see* Hansen, Thomas D.

Jimenez, J. Francisco, *see* Bergman, Stuart K.

Johnson, Brynte H., *see* Fassoulaki, Argyro; *also see* Yasuda, Nobuhiko

Johnson, D., Hurst, T., Cujec, B., Mayers, I.: Cardiopulmonary Effects of an Anterior Mediastinal Mass in Dogs Anesthetized with Halothane, 725

Johnson, G. Kevin, *see* Bailey, Peter L.

Johns, Roger A., *see* Frankville, David D.

Johnston, W. E., *see* Robertie, P. G.

Joyon, Dominique, *see* Marty, Jean

## K

Kainuma, Motoshi, Fujiwara, Yoshihiro, Kimura, Nobuyuki, Shitaokoshi, Akira, Nakashima, Koichi, Shimada, Yasuhiro: Monitoring Hepatic Venous Hemoglobin Oxygen Saturation in Patients Undergoing Liver Surgery, 49

Kaiser, Roger E., Jr., *see* Delaney, Wendy A.

Kallio, A., *see* Aho, Martina

Kamibayashi, Takahiko, *see* Hayashi, Yukio

Kampine, John P., *see* Eskinder, Hanna; *also see* Gallenberg, Lori A.; *also see* Hartman, J. Craig; *also see* Pagel, Paul S.; *also see* Proctor, Lester T.; *also see* Rooney, Rosemary T.; *also see* Stowe, David F.

Kao, Tzu-Cheng, *see* Stevens, Rom A.

Kaplan, Richard F., *see* Robertson, Ralph E.

Karagianes, Thomas G., *see* Oden, Rollin V.

Kass, Ira S., *see* Abramowicz, A. Elisabeth

Katz, Jeffrey A., Lukin, Robert, Bridenbaugh, Philip O., Gunzenhauser, Leslie: Subdural Intracranial Air: An Unusual Cause of Headache after Epidural Steroid Injection, 615

Kauppila, Timo, Kemppainen, Pentti, Tanila, Heikki, Pertovaara, Antti: Effect of Systemic Medetomidine, an Alpha<sub>2</sub> Adrenoceptor Agonist, on Experimental Pain in Humans, 3

Keats, Arthur S., *see* Slogoff, Stephen

Kelly, Dennis L., *see* Mangar, Devanand

Kemppainen, Pentti, *see* Kauppila, Timo

Kendig, Joan J., Courtney, Kenneth R.: New Modes of Nerve Block, 207

Kendig, Joan J., *see* MacIver, M. Bruce

Kerber, Richard E., Vandenberg, Byron F.: Reply, 959

Kerman-Hinds, Ann, *see* Iwasaki, Hiroshi

Kettler, Robert E., *see* Pattison, Christine Z.

Khuenl-Brady, Karin S., *see* Segredo, Veronica

Kim, Song-Jung, *see* Crystal, George J.

Kimura, Nobuyuki, *see* Kainuma, Motoshi

Kimura, Tetsu, *see* Nishikawa, Toshiaki

Kirby, Robert R., Banner, Michael J., Downs, John B.: Clinical Applications of Ventilatory Support, 798

Kirby, Thomas, *see* Smiley, Richard M.

Kirsch, Jeffrey R.: Clinical Anesthesia in Neurosurgery, 1175

Kissin, Igor, McDanal, Judy, Crisologo, Peter A., Reply, 1168

Kissin, Igor, Brown, Pamela T., Robinson, C. Andrew, Bradley, Edwin L., Jr.: Acute Tolerance in Morphine Analgesia: Continuous Infusion and Single Injection in Rats, 166

Kissin, Igor, *see* Crisologo, Peter A.

Kitahata, Luke M., *see* Omote, Keiichi

Klochany, Alan, *see* Zaidan, James R.

Knight, Paul R., *see* Shayevitz, Jay R.

Kobayashi, Tsutomu, *see* Shibata, Keizo

Konstadt, Steven N., Louie, Eric K., Black, Susan, Rao, T. L. K., Scanlon, Patrick: Intraoperative Detection of Patent Foramen Ovale by Transesophageal Echocardiography, 212

Korttila, K., *see* Aho, Martina

Koschel, Klaus, *see* Kress, Hans G.

Koski, Greg, *see* Philbin, Daniel M.

Krebs, Lynne H., *see* Pattison, Christine Z.

Kreitzman, Ted R., Samuels, Stanley I.: Reply, 1159

Kress, Hans G., Müller, Jutta, Eisert, Albert, Gilge, Ulrich, Tas, Piet W., Koschel, Klaus: Effects of Volatile Anesthetics on Cytoplasmic Ca<sup>2+</sup> Signaling and Transmitter Release in a Neural Cell Line, 309

Kretchman, Ellen, *see* Goldstein-Dresner, Michelle C.

Kruse-Elliott, Kris, *see* Hellyer, Peter W.

Kuecherer, Helmut F., *see* Muhiudeen, Isobel A.

Kuro, Masakazu, *see* Hayashi, Yukio

## L

Lahet, Bradley S., *see* Bentley, John B.

Lake, Carol L., *see* Frankville, David D.

Lamond, Roderick G., *see* Miller, Lawrence R.

Langerman, L., Golomb, E., Benita, S.: Spinal Anesthesia: Significant Prolongation of the

Pharmacologic Effect of Tetracaine with Lipid Solution of the Agent, 105

Lang, John B.: Nitrous Oxide Abuse Presenting as Premature Exhaustion of Soda-sorb, 382

Larach, David R., *see* Gibbs, Neville M.

laRochelle, Christophe Drieu, *see* Riou, Bruno

Larson, Christopher E., *see* Green, James M.

Laster, Michael, *see* Rampil, Ira J.

Laster, Michael J., *see* Caldwell, James E.

Laxenaire, Marie-Claire, *see* Moneret-Vautrin, D. Anne

Lazarchick, J., *see* Sternberg, T. L.

Lee, Edmond, *see* Muhiudeen, Isobel A.

Lee, T., Lin, Y.: Protamine: A Cardiotoxic Agent with Negative Inotropism, 635

Lehtinen, A-M., *see* Aho, Martina

Leighton, Barbara L.: A Complication Following Prophylactic Blood Patch: Spinal or Subdural Anesthesia?, 1166

Leivers, David: Reply, 1167

Lema, Guillermo, Urzua, Jorge, Moran, Sergio, Canessa, Roberto: Successful Anesthetic Management of a Patient with Hypokalemic Familial Periodic Paralysis Undergoing Cardiac Surgery, 373

Lema, Mark J., *see* deLeon-Casasola, Oscar A.

Lerman, Jerrold, *see* Sloan, Mark H.; *also see* Taylor, Robert H.

Lessard, Martin R., Trépanier, Claude A.: Renal Function and Hemodynamics during Prolonged Isoflurane-induced Hypotension in Humans, 860

Leung, Jacqueline M., Goehner, Paul, O'Kelly, Brian F., Hollenberg, Milton, Pineda, Nito, Cason, Brian A., Mangano, Dennis T., S. P. I. Research Group: Isoflurane Anesthesia and Myocardial Ischemia: Comparative Risk versus Sufentanil Anesthesia in Patients Undergoing Coronary Artery Bypass Graft Surgery, 838

Leung, Jacqueline M., *see* Smith, Randall C.

Levine, Marc I., Wald, Alvin: Hazard with Warming Lights, 959

Levron, J. C., *see* Quintin, L.

Licina, Michael G., Schubert, Armin, Tobin, James E., Nicodemus, Honorato F., Spitzer, Loren: Intrathecal Morphine Does Not Reduced Minimum Alveolar Concentration of Halothane in Humans: Results of a Double-blind Study, 660

Lindner, Karl H., Ahnefeld, Friedrich W., Bowdler, Ingrid M., Prengel, Andreas W.: Influence of Epinephrine on Systemic, Myocardial, and Cerebral Acid-Base Status during Cardiopulmonary Resuscitation, 333

Lin, Y., *see* Lee, T.

Li, Qian, *see* Freeman, Lisa C.

Litt, Lawrence, *see* Lockhart, Stephen H.

Liu, Letty M. P., *see* Coté, Charles J.

Lockhart, Stephen H., Cohen, Yoram, Yasuda, Nobuhiko, Freire, Beth, Taheri,

Shahram, Litt, Lawrence, Eger, Edmond I., II: Cerebral Uptake and Elimination of Desflurane, Isoflurane, and Halothane from Rabbit Brain: An In Vivo NMR Study, 575  
Lockhart, Stephen H., Rampil, Ira J., Yasuda, Nobuhiko, Eger, Edmond I., II, Weiskopf, Richard B.: Depression of Ventilation by Desflurane in Humans, 484  
Lockhart, Stephen H., *see* Fassoulaki, Argyro; *also see* Rampil, Ira J.; *also see* Yasuda, Nobuhiko  
Lodhia, Kanchan L., *see* Vacanti, Charles A.  
Long, Audrey L., Venditti, Ferdinand J., Jr.: Lithotripsy in a Patient with an Automatic Implantable Cardioverter Defibrillator, 937  
Longo, Dan L., *see* Rudnick, Steven  
Lorenz, Tim, *see* Abouleish, Ezzat  
Losasso, Thomas J., Muzzi, Donald A., Cucchiara, Roy F.: Response of Fetal Heart Rate to Maternal Administration of Es-molol, 782  
Losasso, Thomas J., *see* Muzzi, Donald A.  
Louie, Eric K., *see* Konstadt, Steven N.  
Louwsma, David L., *see* Stevens, Rom A.  
Lowenstein, Edward, *see* Hurford, William E.  
Luban, Naomi L. C., *see* Welborn, Leila G.  
Lucas, Linda F., Tsueda, Kentaro: Reply, 634  
Lukin, Robert, *see* Katz, Jeffrey A.  
Lutz, Lon J., Milde, James H., Milde, Leslie Newberg: The Response of the Canine Cerebral Circulation to Hyperventilation during Anesthesia with Desflurane, 504  
Lynam, Daniel P., *see* Caldwell, James E.; *also see* Magorian, Toni T.  
Lynch, Karen E., *see* Hurford, William E.

M

MacIntyre, Neil R., *see* Tobin, Martin J.  
MacIver, M. Bruce, Kendig, Joan J.: Anesthetic Effects on Resting Membrane Potential Are Voltage-dependent and Agent-specific, 83  
MacIver, M. Bruce, *see* Tanelian, Darrell L.  
Madireddi, Lakshmi, *see* Pattison, Christine Z.  
Maekawa, Nobuhiro, *see* Mikawa, Katsuya  
Magorian, Toni, *see* Caldwell, James E.  
Magorian, Toni T., Caldwell, James, Miller, Ronald D., Lynam, Daniel P.: Reply, 1170  
Mandell, Gordon, *see* Eisenach, James C.  
Mangano, Dennis T., *see* Leung, Jacqueline M.; *also see* Smith, Randall C.  
Mangar, Devanand: Reply, 791  
Mangar, Devanand, Kelly, Dennis L., Holder, Donovan O., Camporesi, Enrico M.: Brachial Plexus Compression from a Malpositioned Chest Tube after Thoracotomy, 780  
Manolio, Teri A., *see* Spear, Robert M.  
Marijic, Jure, *see* Gallenberg, Lori A.; *also see* Rooney, Rosemary T.; *also see* Stowe, David F.  
Mark, James B. D., *see* Brodksy, Jay B.  
Mark, Jonathan B., Chetham, Paul M.: Ventricular Pacing Can Induce Hemodynamically Significant Mitral Valve Regurgitation, 375  
Mark, Jonathan B., *see* Steinbrook, Richard A.  
Marone, Gianni, *see* Stellato, Christiana  
Marshall, Bryan E., *see* O'Hara, Dorene A.  
Martinez, A. P., *see* VanDercar, D. H.  
Martin, Roy W., *see* Bashein, G.  
Martin, William M., *see* Zaidan, James R.  
Marty, Jean, Nitenberg, Alain, Philip, Ivan, Foul, Jean-Marc, Joyon, Dominique, Desmots, Jean-Marie: Coronary and Left Ventricular Hemodynamic Responses Following Reversal of Flunitrazepam-induced Sedation with Flumazenil in Patients with Coronary Artery Disease, 71  
Martyn, J. A. J., Hogue, C. W., Jr.: Reply, 960  
Mascheroni, Daniele, *see* Gattinoni, Luciano  
Mason, William R., *see* Crystal, George J.  
Mastronardi, Pasquale, *see* Stellato, Christiana  
Mathews, Edwin L., *see* Pattison, Christine Z.  
Matteo, Richard S., *see* Smiley, Richard M.  
Maxwell, Lynne G., *see* Spear, Robert M.  
Mayers, I., *see* Johnson, D.  
Maze, Mervyn, Tranquilli, William: Alpha-2 Adrenoceptor Agonists: Defining the Role in Clinical Anesthesia, 581  
Maze, Mervyn, *see* Segal, Ira S.  
Mazzarella, Basilio, *see* Stellato, Christiana  
Mazze, Richard, *see* Timour, Quadiri  
McDanal, Judy, *see* Crisologo, Peter A.; *also see* Kissin, Igor  
McGill, Janet B., *see* Hirsch, Irl B.  
McGill, Willis A., *see* Hannallah, Raafat S.  
McGrath, Brian J., Hsia, Judith, Epstein, Burton: Massive Pulmonary Embolism Following Tourniquet Deflation, 618  
McGuire, Joseph, *see* Hynson, James M.; *also see* Sessler, Daniel I.  
Meier, D., *see* Borgeat, A.  
Meistelman, Claude, *see* Donati, François  
Melot, Christian, *see* Baurain, Michel J.  
Merin, Robert G., Bernard, Jean-Marc, Doursout, Marie-Françoise, Cohen, Marvin, Chelly, Jacques E.: Comparison of the Effects of Isoflurane and Desflurane on Cardiovascular Dynamics and Regional Blood Flow in the Chronically Instrumented Dog, 568  
Merin, Robert G., *see* Bernard, Jean-Marc  
Meyer, Robert E., *see* Hellyer, Peter W.  
Mikawa, Katsuya, Maekawa, Nobuhiro, Goto, Ryokichi, Tanaka, Osamu, Yaku, Hideaki, Obara, Hidefumi: Effects of Exogenous Intravenous Glucose on Plasma Glucose and Lipid Homeostasis in Anesthetized Children, 1017  
Milde, James H., *see* Lutz, Lon J.; *also see* Milde, Leslie Newberg; *also see* Wedel, Denise J.  
Milde, Leslie Newberg, Milde, James H.: The Cerebral and Systemic Hemodynamic and Metabolic Effects of Desflurane-induced Hypotension in Dogs, 513  
Milde, Leslie Newberg, *see* Lutz, Lon J.  
Miller, Anthony C., Scherba-Krugliak, Lena, Toy, Pearl T., Drasner, Kenneth: Hypotension during Transfusion on Autologous Blood, 624  
Miller, Lawrence R., Drummond, John C., Lamond, Roderick G.: Refractory Arterial and Intracranial Hypertension in the Intensive Care Unit: Successful Treatment with Isoflurane, 946  
Miller, Ronald D., *see* Heier, Tom; *also see* Magorian, Toni T.; *also see* Segredo, Veronica; *also see* Smith, Graham  
Miller, Tim, *see* Hindman, Bradley J.  
Mills, Stephen A., *see* Rogers, Anne T.  
Moayeri, Azita, *see* Sessler, Daniel I.  
Modica, Paul A., *see* Williams, E. Lynne  
Moller, Jakob Trier: Reply, 1161  
Moneret-Vautrin, D. Anne, Laxenaire, Marie-Claire: Reply, 391  
Monk, Terri G., Rater, Joseph M., White, Paul F.: Comparison of Alfentanil and Ketamine Infusions in Combination with Midazolam for Outpatient Lithotripsy, 1023  
Moore, Daniel C.: If Ventricular Conduction and Rhythm Disorders Are Caused by Bupivacaine, It Is Doubtful That Intraoperative Hyponatremia and Hyperkalemia Enhance Them, 383  
Morales, George A., Gilbert, Timothy B.: An Aid for Simultaneous Instructor and Trainee Viewing of Orotracheal Intubation, 1173  
Moran, Sergio, *see* Lema, Guillermo  
Morgan, M., *see* Smith, Graham  
Mostello, Lucille A., *see* Slater, Jay E.  
Motin, J., *see* Quintin, L.  
Mourisse, Piet, *see* Vertommen, Jan D.  
Muhiudeen, Isobel A., Kuecherer, Helmut F., Lee, Edmond, Cahalan, Michael K., Schiller, Nelson B.: Intraoperative Estimation of Cardiac Output by Transesophageal Pulsed Doppler Echocardiography, 9  
Müller, Jutta, *see* Kress, Hans G.  
Müller, Rainer Karl, *see* Tarnow, Jörg  
Murakami, Seitsu, *see* Shibata, Keizo  
Murray, Michael J., *see* Nuttall, Gregory A.  
Mutch, W. A. C., Thomson, I. R., Teskey, J. M., Thiessen, D., Rosenbloom, M.: Phlebotomy Reverses the Hemodynamic Consequences of Thoracic Aortic Cross-clamping: Relationships Between Central Venous Pressure and Cerebrospinal Fluid Pressure, 320  
Muzzi, Donald A., Losasso, Thomas J., Cucchiara, Roy F.: Complication from a Nasopharyngeal Airway in a Patient with a Basilar Skull Fracture, 366  
Muzzi, Donald A., *see* Losasso, Thomas J.

## N

- Naclerio, Robert, *see* Spear, Robert M.  
Nakagawa, Itsuo, *see* Omote, Keiichi  
Nakano, Sonoko, Tashiro, Chikara, Nishimura, Masaji, Ueyama, Hiroshi, Uchiyama, Akinori: Perioperative Use of High-frequency Oscillation Immediately after Birth in Two Neonates with Congenital Cystic Adenomatoid Malformation, 939  
Nakashima, Koichi, *see* Kainuma, Motoshi  
Nakatani, Keio, *see* Omote, Keiichi  
Navedo, Andres T., *see* Smiley, Richard M.  
Nawfal, Maud, *see* Baraka, Anis  
Neal, Blake, *see* Crisologo, Peter A.  
Nichols, David G., *see* Spear, Robert M.  
Nicodemus, Honorato F., *see* Licina, Michael G.  
Nigrovic, V., Fox, J. L.: Atracurium Decay and the Formation of Laudanosine in Humans, 446  
Nishikawa, Toshiaki, Kimura, Tetsu, Taguchi, Noriko, Dohi, Shuji: Oral Clonidine Preanesthetic Medication Augments the Pressor Responses to Intravenous Ephedrine in Awake or Anesthetized Patients, 705  
Nishimura, Masaji, *see* Nakano, Sonoko  
Nitenberg, Alain, *see* Marty, Jean  
Noe, Carl E., Haynsworth, Robert F., Jr.: Reply, 956  
Noe, Carl E., *see* Haynsworth, Robert F., Jr.  
Nöldge, Gabriele F. E., Priebe, Hans-Joachim, Bohle, Wolfram, Buttler, Klaus Jürgen, Geiger, Klaus: Effects of Acute Normovolemic Hemodilution on Splanchnic Oxygenation and on Hepatic Histology and Metabolism in Anesthetized Pigs, 908  
Noorduyn, Henk, *see* Vertommen, Jan D.  
Nordberg, Gunnar, *see* Hansdottir, Vigdis  
Norden, Janet M., *see* Hannallah, Raafat S.  
North, Brian, Reilly, Peter: Raised Intracranial Pressure, 799  
Nuttall, Gregory A., Murray, Michael J., Bowie, E. J. Walter: Protamine-Heparin-induced Pulmonary Hypertension in Pigs: Effects of Treatment with a Thromboxane Receptor Antagonist on Hemodynamics and Coagulation, 138

## O

- Obara, Hidefumi, *see* Mikawa, Katsuya  
O'Connor, Theresa, *see* Gordon, Michael A.  
O'Connor, Theresa Z., *see* Brull, Sorin J.  
Oden, Rollin V., Karagianes, Thomas G.: Postoperative Myocardial Ischemia Possibly Masked by Epidural Fentanyl Analgesia, 941  
O'Hara, Dorene A., Derbyshire, Garrett J., Overdyk, Frank J., Bogen, Daniel K., Mar-

- shall, Bryan E.: Closed-loop Infusion of Atracurium with Four Different Anesthetic Techniques, 258  
O'Kelly, Brian F., *see* Leung, Jacqueline M.  
Olsen, Niels V., *see* Pedersen, Tom  
Olsen, Richard, *see* Iaizzo, Paul A.  
Omote, Keiichi, Kitahata, Luke M., Collins, J. G., Nakatani, Keio, Nakagawa, Itsuo: Interaction Between Opiate Subtype and Alpha-2 Adrenergic Agonists in Suppression of Noxiously Evoked Activity of WDR Neurons in the Spinal Dorsal Horn, 737  
Ornstein, Eugene, *see* Smiley, Richard M.  
Orser, Beverley: Thrombocytopenia and Cocaine Abuse, 195  
Osborne, LeRoy R., *see* Grum, Daniel F.  
Oshima, Eiji, Arai, Toshiyuki, Urabe, Nobukata: New Anatomic Landmarks for Percutaneous Catheterization of the Internal Jugular Vein, 1164  
Overdyk, Frank J., *see* O'Hara, Dorene A.  
Ozaki, George T., *see* Benumof, Jonathan L.

## P

- Pace, Nathan L., *see* Bailey, Peter L.  
Pagel, Paul S., Kampine, John P., Schmeling, William T., Warltier, David C.: Alteration of Left Ventricular Diastolic Function by Desflurane, Isoflurane, and Halothane in the Chronically Instrumented Dog with Autonomic Nervous System Blockade, 1103  
Pagel, Paul S., Kampine, John P., Schmeling, William T., Warltier, David C.: Comparison of the Systemic and Coronary Hemodynamic Actions of Desflurane, Isoflurane, Halothane, and Enflurane in the Chronically Instrumented Dog, 539  
Pagel, Paul S., Kampine, John P., Schmeling, William T., Warltier, David C.: Influence of Volatile Anesthetics on Myocardial Contractility In Vivo: Desflurane versus Isoflurane, 900  
Palmer, Craig M.: Early Respiratory Depression Following Intrathecal Fentanyl—Morphine Combination, 1153  
Palmer, Susan K., *see* Slover, Robin  
Palmieri, John, Garden, Jerome M., Seleny, Frank L., Stevenson, G. W.: Unrecognized Cyanosis during Laser Treatment of Cutaneous Vascular Lesions, 1164  
Pandit, Sujit K.: Anesthesia for Ambulatory Surgery, 968  
Pantuck, Carol B., *see* Smiley, Richard M.  
Pantuck, Eugene J., *see* Smiley, Richard M.  
Parent, Jaime B., *see* Downs, Gregory J.  
Pattison, Christine Z., Atlee, John L., III, Krebs, Lynne H., Madireddi, Lakshmi, Kettler, Robert E.: Transesophageal Indirect Atrial Pacing for Drug-resistant Sinus Bradycardia, 1141  
Pattison, Christine Z., Atlee, John L., III, Matthews, Edwin L., Buljubasic, Nediljka, Entress, Jeffrey J.: Atrial Pacing Thresholds Measured in Anesthetized Patients with the Use of an Esophageal Stethoscope Modified for Pacing, 854  
Payen, D., *see* Jacob, L.  
Pedersen, Tom, Bang, Ulla, Olsen, Niels V., Jensen, Erik, Engbæk, Jens, Viby-Mogensen, Jorgen: Reply, 957  
Pelosi, Paolo, *see* Gattinoni, Luciano  
Perez, Concepcion, *see* Castella, Xavier  
Pertovaara, Antti, *see* Kauppila, Timo  
Pesenti, Antonio, *see* Gattinoni, Luciano  
Peters, Jürgen: Reply, 633  
Peterson, Natalie, *see* Rampil, Ira J.  
Philbin, Daniel M., Rosow, Carl E., Schneider, Robert C., Koski, Greg, D'Ambra, Michael N.: Reply, 389  
Philip, Ivan, *see* Marty, Jean  
Philip, James H., *see* Steinbrook, Richard A.  
Phipps, Julia, *see* Rogers, Anne T.  
Pineda, Nito, *see* Leung, Jacqueline M.  
Plaud, Benoît, *see* Donati, François  
Polaner, David, *see* Coté, Charles J.  
Popic, Peter M., *see* Jameson, Leslie C.  
Popovic, V., *see* Borgeat, A.  
Posner, Karen, *see* Chadwick, H. S.  
Pounder, D. R., Blackstock, D., Steward, D. J.: Tracheal Extubation in Children: Halothane versus Isoflurane, Anesthetized versus Awake, 653  
Powis, Garth, *see* Iaizzo, Paul A.  
Pregel, Andreas W., *see* Lindner, Karl H.  
Presson, R. G., Jr., *see* Christenson, James C.  
Priebe, Hans-Joachim, *see* Nöldge, Gabriele F. E.  
Prielipp, Richard C., Zaloga, Gary P., Butterworth, John F., IV, Robertie, Paul G., Dudas, Louise M., Black, Kimberly W., Royster, Roger L.: Magnesium Inhibits the Hypertensive but Not the Cardiotonic Actions of Low-dose Epinephrine, 973  
Proctor, Lester T., Schmeling, William T., Roerig, David, Kampine, John P., Warltier, David C.: Oral Dexmedetomidine Attenuates Hemodynamic Responses during Emergence from General Anesthesia in Chronically Instrumented Dogs, 108  
Prough, Donald S., *see* Rogers, Anne T.  
Prutow, Richard, *see* Dueck, Ronald  
Pullerits, J., *see* Yemem, T. A.

## Q

- Quigg, Mary, *see* Drenger, Benjamin  
Quintin, L., Viale, J. P., Annat, G., Hoehn, J. P., Butin, E., Cottet-Emard, J. M., Lev-

ron, J. C., Bussery, D., Motin, J.: Oxygen Uptake after Major Abdominal Surgery: Effect of Clonidine, 236

R

Rabary, O., *see* Jacob, L.

Raemer, Daniel B., *see* Steinbrook, Richard A.

Raines, Douglas E., Hogue, Charles W., Jr., Wickens, Charles, Welch, James, Risk, S. Clay: Artfactual Hypertension Due to Transducer Cable Malfunction, 1149

Raja, Srinivasa N., Treede, Rolf-Detlef, Davis, Karen D., Campbell, James N.: Systemic Alpha-adrenergic Blockade with Phentolamine: A Diagnostic Test for Sympathetically Maintained Pain, 691

Raja, Srinivasa N., *see* Berkowitz, Ivor D.

Ramamurthy, Somayaji, *see* Hickey, Rosemary  
Rampil, Ira J., Laster, Michael, Dwyer, Rory C., Taheri, Shahram, Eger, Edmond I., II: No EEG Evidence of Acute Tolerance to Desflurane in Swine, 889

Rampil, Ira J., Lockhart, Stephen H., Eger, Edmond I., II, Yasuda, Nobuhiko, Weiskopf, Richard B., Cahalan, Michael K.: The Electroencephalographic Effects of Desflurane in Humans, 434

Rampil, Ira J., Lockhart, Stephen H., Zwass, Maurice S., Peterson, Natalie, Yasuda, Nobuhiko, Eger, Edmond I., II, Weiskopf, Richard B., Damask, Michael C.: Clinical Characteristics of Desflurane in Surgical Patients: Minimum Alveolar Concentration, 429

Rampil, Ira J., *see* Lockhart, Stephen H.

Ramsay, Mike, *see* Swygert, Tom

Rao, T. L. K., *see* Konstadt, Steven N.

Rashad, M. Nabil, *see* Abouleish, Ezzat

Rater, Joseph M., *see* Monk, Terri G.

Rauck, Richard L., *see* Jackson, Kyle E.

Rausin, Isabelle, *see* Bardoczky, Gizella I.

Rawal, Narinder, *see* Abouleish, Ezzat

Rehder, Kai, *see* Brichant, Jean-François

Rehkopf, Paul, *see* Green, James M.

Reilly, Peter, *see* North, Brian

Reinsel, Ruth, *see* Veselis, Robert A.

Reisner, Laurence S., *see* Ellis, D. Jill

Reitan, John A., *see* Gonert, Brian J.

Richman, Douglas, *see* Dueck, Ronald

Ricos, Monserrat, *see* Canet, Jaume

Ries, Marianne, *see* De Vera, H. V.

Riou, Bruno, Gérard, Jean-Louis, laRoche, Christophe, Drieu, Bourdon, Raymond, Berdeaux, Alain, Giudicelli, Jean-François: Hemodynamic Effects of Hydroxocobalamin in Conscious Dogs, 552

Risk, S. Clay, *see* Raines, Douglas E.

Robertie, Paul G., *see* Prielipp, Richard C.

Robertie, P. G., Johnston, W. E., Williamson, M. K., Dudas, L. M., Wallenhaupt, S. L., Ganz, W.: Clinical Utility of a Position-monitoring Catheter in the Pulmonary Artery, 440

Robertson, Ralph E., Kaplan, Richard F.: Another Site for the Pulse Oximeter Probe, 198

Robinson, C. Andrew, *see* Kissin, Igor

Robotham, James L., Takata, Masao, Berman, Michael, Harasawa, Yasuhiko: Ejection Fraction Revisited, 172

Roerig, David, *see* Proctor, Lester T.

Rogers, Anne T., Prough, Donald S., Gravelee, Glenn P., Roy, Raymond C., Mills, Stephen A., Stump, David A., Phipps, Julia, Royster, Roger L., Taylor, Carol L.: Sodium Nitroprusside Infusion Does Not Dilate Cerebral Resistance Vessels during Hypothermic Cardiopulmonary Bypass, 820

Rolf, Norbert, *see* Coté, Charles J.

Romanoff, Mark E., Ellis, Jay S., Jr.: Myofascial Pain Syndrome Can Cause Right Upper Quadrant Pain, 955

Rooney, Rosemary T., Stowe, David F., Marjic, Jure, Bosnjak, Zeljko J., Kampine, John P.: Amrinone Reverses Cardiac Depression and Augments Coronary Vasodilation with Isoflurane in the Isolated Heart, 559

Rosenbloom, M., *see* Mutch, W. A. C.

Rosen, Michael R., *see* Sun, Lena S.

Rosow, Carl E., *see* Dershwitz, Mark; *also see* Philbin, Daniel M.

Roy, Raymond C., *see* Rogers, Anne T.

Royster, Roger L., *see* Prielipp, Richard C.; *also see* Rogers, Anne T.

Rudnick, Steven, Stevenson, G. W., Hall, Steven C., Espinoza-Delgado, Igor, Stevenson, Henry C., Longo, Dan L.: Halothane Potentiates the Antitumor Activity of Gamma-interferon and Mimics Calmodulin-blocking Agents, 115

Rusch, Nancy J., *see* Bosnjak, Zeljko J.; *also see* Eskinder, Hanna

Rusk, Ron, *see* Benumof, Jonathan L.

Ruttimann, Urs E., *see* Welborn, Leila G.

Ryan, John F., *see* Coté, Charles J.

S

Saidman, Lawrence J.: The Role of Desflurane in the Practice of Anesthesia, 399

Saidman, Lawrence J., *see* Smith, Graham  
Saint-Maurice, Claude, Schulte-Steinberg, Ottheinz: Regional Anaesthesia in Children, 206

Saito, Yoji, *see* Iwasaki, Hiroshi

Salem, M. Ramez, *see* Crystal, George J.

Samra, Satwant K., Sorkin, Linda S.: Enhancement of Somatosensory Evoked Po-

tentials by Etomidate in Cats: An Investigation of Its Site of Action, 499

Samuels, Stanley I., *see* Kreitzman, Ted R.

Sanford, T. J., *see* Drummond, John C.

Sangwan, Susheela, *see* Wong, Robert S.

Sarfati, E., *see* Jacob, L.

Sargent, William W.: Anesthetic Management of a Patient with Cornelia de Lange Syndrome, 1162

Sari, Atsuo, *see* Yonei, Akitomo

Sauder, Russell A., *see* Tobias, Joseph D.

Savino, Joseph S., *see* Troianos, Christopher A.

Scanlon, Patrick, *see* Konstadt, Steven N.

Scherba-Krugliak, Lena, *see* Miller, Anthony C.

Schiff, Gerald A., Simpson, Joseph I.: Unilateral Pulmonary Edema after Atrial Septal Defect Repair, 785

Schiller, Nelson B., *see* Muhiudeen, Isobel A.

Schmeling, William T., *see* Hartman, J. Craig; *also see* Pagel, Paul S.; *also see* Proctor, Lester T.

Schneider, Markus, Datta, Sanjay, Strichartz, Gary: A Preferential Inhibition of Impulses in C-fibers of the Rabbit Vagus Nerve by Veratridine, an Activator of Sodium Channels, 270

Schneider, Robert C., *see* Philbin, Daniel M.

Schubert, Armin, *see* Licina, Michael G.

Schulman, Larry L., *see* Smiley, Richard M.

Schulte-Steinberg, Ottheinz, *see* Saint-Maurice, Claude

Schwander, D., *see* Borgeat, A.

Schweiger, Ian M., Hall, Richard I., Hug, Carl C., Jr.: Less Than Additive Antinociceptive Interaction Between Midazolam and Fentanyl in Enflurane-anesthetized Dogs, 1060

Schwid, Howard A., *see* Chabal, Charles

Scott, James C., Cooke, James E., Stanski, Donald R.: Electroencephalographic Quantitation of Opioid Effect: Comparative Pharmacodynamics of Fentanyl and Sufentanil, 34

Seewald, Markus J., *see* Iaizzo, Paul A.

Segal, Ira S., Jarvis, David J., Duncan, Steven R., White, Paul F., Maze, Mervyn: Clinical Efficacy of Oral-Transdermal Clonidine Combinations during the Perioperative Period, 220

Segredo, Veronica, Sharma, Manohar, Gruenke, Larry D., Miller, Ronald D.: Reply, 793

Segredo, Veronica, Shin, Yang-Sik, Sharma, Manohar L., Gruenke, Larry D., Caldwell, James E., Khuenl-Brady, Karin S., Agoston, Sandor, Miller, Ronald D.: Pharmacokinetics, Neuromuscular Effects, and Biodisposition of 3-Desacetylvcuronium (Org 7268) in Cats, 1052

Seleny, Frank L., *see* Palmieri, John

Sessler, Andrew M., *see* Sessler, Daniel I.



- Sessler, Daniel I., McGuire, Joseph, Moayeri, Azita, Hynson, James: Isoflurane-induced Vasodilation Minimally Increases Cutaneous Heat Loss, 226
- Sessler, Daniel I., McGuire, Joseph, Sessler, Andrew M.: Perioperative Thermal Insulation, 875
- Sessler, Daniel I., *see* Heier, Tom; *also see* Hynson, James M.
- Severinghaus, John W., Xu, Fa-Di, Spellman, Michael J., Jr.: Benzocaine and Methemoglobin: Recommended Actions, 385
- Shafer, Steven L.: More on Pharmacokinetics with a Pocket Calculator, 631
- Shafer, Steven L., Varvel, John R.: Pharmacokinetics, Pharmacodynamics, and Rational Opioid Selection, 53
- Shamsai, Javad: Central Anticholinergic Syndrome: Does It Exist?, 1158
- Sharma, Manohar, *see* Segredo, Veronica
- Sharma, Manohar L., *see* Segredo, Veronica
- Sharrock, Nigel E., *see* Stevens, Rom A.
- Shatz, Matthew J., *see* Stein, Mark H.
- Shaw, James, *see* Abouleish, Ezzat
- Shayevitz, Jay R., Varani, James, Ward, Peter A., Knight, Paul R.: Halothane and Isoflurane Increase Pulmonary Artery Endothelial Cell Sensitivity to Oxidant-mediated Injury, 1067
- Sherry, Eoin, Davy, Humphrey: Hazards of Reusing Disposable Syringes: II, 790
- Shibata, Keizo, Yamamoto, Yasunori, Kobayashi, Tsutomu, Murakami, Seitsu: Beneficial Effect of Upper Thoracic Epidural Anesthesia in Experimental Hemorrhagic Shock in Dogs: Influence of Circulating Catecholamines, 303
- Shimada, Yasuhiro, *see* Kainuma, Motoshi
- Shin, Yang-Sik, *see* Segredo, Veronica
- Shitaokoshi, Akira, *see* Kainuma, Motoshi
- Short, Charles D., *see* Bucoli, Kevin D.
- Shorten, George, *see* Ali, Hassan H.
- Siegel, Lawrence C., Fitzgerald, David C., Engstrom, Ray H.: Simultaneous Intraoperative Measurement of Cardiac Output by Thermodilution and Transtracheal Doppler, 664
- Siewers, Ralph D., *see* Goldstein-Dresner, Michelle C.
- Silverman, David G., *see* Brull, Sorin J.
- Simpson, Joseph I., *see* Schiff, Gerald A.
- Sipes, Susan L., *see* Vincent, Robert D., Jr.
- Slater, Jay E., Mostello, Lucille A.: Routine Testing for Latex Allergy in Patients with Spina Bifida Is Not Recommended, 391
- Sloan, Mark H., Lerman, Jerrold, Bissonnette, Bruno: Pharmacodynamics of High-dose Vecuronium in Children during Balanced Anesthesia, 656
- Slogoff, Stephen, Keats, Arthur S.: Reply, 1172
- Slover, Robin, Palmer, Susan K.: Epidural versus Intravenous Fentanyl: A Problem with Small Sample Size, 795
- Slucky, Alexey V., *see* Bevacqua, Brian K.
- Smiley, Richard M., Navedo, Andres T., Kirby, Thomas, Schulman, Larry L.: Postoperative Independent Lung Ventilation in a Single-lung Transplant Recipient, 1144
- Smiley, Richard M., Ornstein, Eugene, Matteo, Richard S., Pantuck, Eugene J., Pantuck, Carol B.: Desflurane and Isoflurane in Surgical Patients: Comparison of Emergence Time, 425
- Smith, Graham, Miller, Ronald D., Saidman, Lawrence J., Morgan, M.: Ethics in Publishing, 637
- Smith, Randall C., Leung, Jacqueline M., Mangano, Dennis T., S. P. I. Research Group: Postoperative Myocardial Ischemia in Patients Undergoing Coronary Artery Bypass Graft Surgery, 464
- Soetens, Maurits, *see* Vertommen, Jan D.
- Sommer, Richard M., Capan, Levon M.: An Aid in Cases of Difficult Tracheal Intubation, 964
- Sonbolian, Nasser, *see* Green, James M.
- Sorkin, Linda S., *see* Samra, Satwant K.
- Sosis, Mitchel B., Harbut, Ronald E.: A Caution on the Use of Routine Depth of Insertion of Endotracheal Tubes, 961
- Spear, Robert M., Yaster, Myron, Berkowitz, Ivor D., Maxwell, Lynne G., Bender, Karen S., Naclerio, Robert, Manolio, Teri A., Nichols, David G.: Preinduction of Anesthesia in Children with Rectally Administered Midazolam, 670
- Spellman, Michael J., Jr., *see* Severinghaus, John W.
- Sperry, Richard J., *see* Bailey, Peter L.
- Spierdijk, Johan, *see* Veering, Bernadette T.
- S. P. I. Research Group, *see* Leung, Jacqueline M.
- S. P. I. Research Group, *see* Smith, Randall C.
- Spitzer, Loren, *see* Licina, Michael G.; *also see* Stevens, Rom A.
- Sprung, Juraj, Conley, Stephen F., Brown, Mary: Unusual Cause of Difficult Extubation, 796
- Stanley, Theodore H., Bailey, Peter L.: Fentanyl and Sufentanil Anesthesia Revisited: Establish an Effective Plasma Concentration and Achieve It at the Right Time, 388
- Stanley, Theodore H., *see* Bailey, Peter L.
- Stanski, Donald R., *see* Scott, James C.
- Steinbrook, Richard A., Goldman, Donald B., Mark, Jonathan B., Philip, James H., Raemer, Daniel B.: How Best to Monitor for Detection of Myocardial Ischemia?, 1171
- Stein, Mark H., Shatz, Matthew J.: Inadvertent Intraarterial Placement of a Sheath Introducer while Using the Raulerson Syringe, 633
- Stellato, Christiana, dePaulis, Amato, Cirillo, Raffaele, Mastronardi, Pasquale, Mazzarella, Basilio, Marone, Gianni: Heterogeneity of Human Mast Cells and Basophils in Response to Muscle Relaxants, 1078
- Sternberg, T. L., Bailey, M. K., Lazarchick, J., Brahen, N. H.: Protein C Deficiency as a Cause of Pulmonary Embolism in the Perioperative Period, 364
- Stevenson, G. W., *see* Palmieri, John
- Stevenson, G. W., *see* Rudnick, Steven
- Stevenson, Henry C., *see* Rudnick, Steven
- Stevens, Rom A.: Complete Sympathetic Blockade?, 632
- Stevens, Rom A., Artuso, James D., Kao, Tzu-Cheng, Bray, Jack G., Spitzer, Loren, Louwmsa, David L.: Changes in Human Plasma Catecholamine Concentrations during Epidural Anesthesia Depend on the Level of Block, 1029
- Stevens, Rom A., Sharrock, Nigel E.: Nystagmus Following Epidural Morphine, 390
- Steward, D. J., *see* Pounder, D. R.
- Stillman, R., *see* Yemen, T. A.
- Stoelting, Robert K.: The 29th Rovenstine Lecture: Clinical Challenges for the Anesthesiologist, 1129
- Storella, Robert J., Jr.: Resistance to d-Tubocurarine Following Denervation, 960
- Stowe, David F., Marijic, Jure, Bosnjak, Zeljko J., Kampine, John P.: Direct Comparative Effects of Halothane, Enflurane, and Isoflurane on Oxygen Supply and Demand in Isolated Hearts, 1087
- Stowe, David F., *see* Gallenberg, Lori A.; *also see* Rooney, Rosemary T.
- Strauss, H. William, *see* Hurford, William E.
- Strichartz, Gary, *see* Schneider, Markus
- Strong, William E.: Epidural Abscess Associated with Epidural Catheterization: A Rare Event? Report of Two Cases with Markedly Delayed Presentation, 943
- Stump, David A., *see* Rogers, Anne T.
- Sumikawa, Koji, *see* Hayashi, Yukio
- Sun, Lena S., Rosen, Michael R.: The Electrophysiologic Effects of Bupivacaine on Adult, Neonatal, and Fetal Guinea Pig Papillary Muscles, 893
- Supan, Franjo D., *see* Bosnjak, Zeljko J.; *also see* Eskinder, Hanna
- Swanson, Clifford R., *see* Hellyer, Peter W.
- Swygert, Tom, Donica, Steve, Ramsay, Mike: Hazards of Reusing Disposable Syringes: I, 790

## T

- Taguchi, Noriko, *see* Nishikawa, Toshiaki
- Taheri, Shahram, *see* Lockhart, Stephen H.; *also see* Rampil, Ira J.
- Takata, Masao, *see* Robotham, James L.
- Tanaka, Osamu, *see* Mikawa, Katsuya

Tanelian, Darrell L., Brose, William G.: Neuropathic Pain Can Be Relieved by Drugs That Are Use-dependent Sodium Channel Blockers: Lidocaine, Carbamazepine, and Mexiletine, 949

Tanelian, Darrell L., MacIver, M. Bruce: Analgesic Concentrations of Lidocaine Suppress Tonic A-delta and C Fiber Discharges Produced by Acute Injury, 934

Taneyama, Chikuni, Goto, Hiroshi: Reply, 954

Tanigawa, Koichi, Inoue, Yoshitaka, Iwata, Sadayuki: Protection of Recurrent Laryngeal Nerve during Neck Surgery: A New Combination of Neutracer, Laryngeal Mask Airway, and Fiberoptic Bronchoscope, 966

Tanila, Heikki, *see* Kauppila, Timo

Tarnow, Jörg, Müller, Rainer Karl: Cardiovascular Effects of Low-dose Epinephrine Infusions in Relation to the Extent of Preoperative  $\beta$ -Adrenoceptor Blockade, 1035

Tashiro, Chikara, *see* Nakano, Sonoko

Tas, Piet W., *see* Kress, Hans G.

Taylor, Carol L., *see* Rogers, Anne T.

Taylor, Robert H., Lerman, Jerrold: High-efficiency Delivery of Salbutamol with a Metered-dose Inhaler in Narrow Tracheal Tubes and Catheters, 360

Tempelhoff, Rene, *see* Williams, E. Lynne

Teskey, J. M., *see* Mutch, W. A. C.

Thiessen, D., *see* Mutch, W. A. C.

Thomson, I. R., *see* Mutch, W. A. C.

Timour, Quadiri, Freysz, Marc, Mazze, Richard, Couzon, Pascale, Bertrix, Lucien, Faucon, Georges: Reply, 384

Tinker, John H., *see* Hindman, Bradley J.

Tobias, Joseph D., Sauder, Russell A., Hirshman, Carol A.: Methylprednisolone Prevents Propanolol-induced Airway Hyperreactivity in the Basenji-greyhound Dog, 1115

Tobin, James E., *see* Licina, Michael G.

Tobin, Martin J., Branson, Richard D., MacIntyre, Neil R.: The Respiratory Muscles. Problems in Respiratory Care, vol. 3, no. 3. September 1990, 799

Tobler, H. Gareth, *see* Brodksy, Jay B.

Todd, Michael M., Hindman, Bradley J., Warner, David S.: Barbiturate Protection and Cardiac Surgery: A Difficult Result, 402

Todd, Michael M., *see* Hansen, Thomas D.

Todd, Michael M., *see* Hindman, Bradley J.

Todres, I. David, *see* Coté, Charles J.

Tong, Chuanyao, *see* Eisenach, James C.

Toy, Pearl T., *see* Miller, Anthony C.

Traill, Roger, *see* Goodie, David

Tranquilli, William, *see* Maze, Mervyn

Treede, Rolf-Detlef, *see* Raja, Srinivasa N.

Trépanier, Claude A., *see* Lessard, Martin R.

Troianos, Christopher A., Savino, Joseph S.: Internal Jugular Vein Cannulation Guided by Echocardiography, 787

Truog, Robert D.: "'Do-Not-Resuscitate'" Orders during Anesthesia and Surgery, 606

Tsueda, Kentaro, *see* Lucas, Linda F.

U

Uchiyama, Akinori, *see* Nakano, Sonoko

Ueyama, Hiroshi, *see* Nakano, Sonoko

Ulatowski, John A.: Spinal Cord Injuries: Anesthetic and Associated Care, 1176

Urabe, Nobukata, *see* Oshima, Eiji

Urban, Michael K., *see* Gordon, Michael A.

Urzua, Jorge, *see* Lema, Guillermo

V

Vacanti, Charles A., Lodhia, Kanchan L.: Fatal Massive Air Embolism during Transurethral Resection of the Prostate, 186

Vaes, Leo, *see* Vertommen, Jan D.

VanAken, Hugo, *see* Vertommen, Jan D.

VanAssche, André F., *see* Vertommen, Jan D.

Vandenberg, Byron F., *see* Kerber, Richard E.

Vanden Hoeven, Robert A. M., *see* Veering, Bernadette T.

VanDercar, D. H., Martinez, A. P., deLisser, E. A.: Sleep Apnea Syndromes: A Potential Contraindication for Patient-controlled Analgesia, 623

Vandermeulen, Eric, *see* Vertommen, Jan D.

VanSteenberge, A., *see* Vertommen, Jan D.

Varani, James, *see* Shayevitz, Jay R.

Varvel, John R., *see* Shafer, Steven L.

Vassallo, Susan, *see* Coté, Charles J.

Veering, Bernadette T., Burm, Anton G. L., Vletter, Arie A., Vanden Hoeven, Robert A. M., Spierdijk, Johan: The Effect of Age on Systemic Absorption and Systemic Disposition of Bupivacaine after Subarachnoid Administration, 250

Venditti, Ferdinand J., Jr., *see* Long, Audrey L.

Vertommen, Jan D., Vandermeulen, Eric, VanAken, Hugo, Vaes, Leo, Soetens, Maurits, VanSteenberge, A., Mourisse, Piet, Willaert, Jan, Noorduin, Henk, Devlieger, Hugo, VanAssche, André F.: The Effects of the Addition of Sufentanil to 0.125% Bupivacaine on the Quality of Analgesia during Labor and on the Incidence of Instrumental Deliveries, 809

Veselis, Robert A., Reinsel, Ruth, Alagesan, Ramdas, Heino, Riitta, Bedford, Robert F.: The EEG as a Monitor of Midazolam Anesthesia: Changes in Power and Topography as a Function of Amnesic State, 866

Viale, J. P., *see* Quintin, L.

Viby-Mogensen, Jorgen, *see* Pedersen, Tom

Vickers, Holly, *see* Audenaert, Steve M.

Vidal, Fernando, *see* Canet, Jaume

Villiers, S., *see* Jacob, L.

Vincent, Robert D., Jr., Chestnut, David H., Sipes, Susan L., Weiner, Carl P., DeBruyn, Craig S., Bleuer, Shari A.: Magnesium Sulfate Decreases Maternal Blood Pressure but Not Uterine Blood Flow during Epidural Anesthesia in Gravid Ewes, 77

Virag, Robert A.: Reply, 796

Vitale, Giovanni, *see* Gattinoni, Luciano

Vletter, Arie A., *see* Veering, Bernadette T.

W

Wachman, Stanley L.: Reply, 387

Walbergh, Eric J., Wills, Robert J., Eckhart, Joanne: Plasma Concentrations of Midazolam in Children Following Intranasal Administration, 233

Wald, Alvin, *see* Levine, Marc I.

Wallenhaupt, S. L., *see* Robetie, P. G.

Ward, Peter A., *see* Shayevitz, Jay R.

Ward, Richard J., *see* Chadwick, H. S.

Wartier, David C.: Reply, 203

Wartier, David C., *see* Hartman, J. Craig; *also see* Pagel, Paul S.; *also see* Proctor, Lester T.

Warner, David O., *see* Brichant, Jean-François

Warner, David S., *see* Hansen, Thomas D.; *also see* Todd, Michael M.

Wedel, Denise J., Iaizzo, Paul A., Milde, James H.: Desflurane Is a Trigger of Malignant Hyperthermia in Susceptible Swine, 508

Wedel, Denise J., *see* Iaizzo, Paul A.

Weiner, Carl P., *see* Vincent, Robert D., Jr.

Weinger, Matthew B.: Proposed New Alarm Standards May Make a Bad Situation Worse, 791

Weiskopf, Richard B., *see* Caldwell, James E.; *also see* Fassoulaki, Argyro; *also see* Lockhart, Stephen H.; *also see* Rampil, Ira J.; *also see* Yasuda, Nobuhiko

Welborn, Leila G., Hannallah, Raafat S., Luban, Naomi L. C., Fink, Robert, Ruttimann, Urs E.: Anemia and Postoperative Apnea in Former Preterm Infants, 1003

Welch, James, *see* Raines, Douglas E.

Westrin, Per: The Induction Dose of Propofol in Infants 1-6 Months of Age and in Children 10-16 Years of Age, 455

White, Paul F.: Outpatient Anesthesia, 205

White, Paul F., *see* Ghouri, Ahmed F.; *also see* Hirsch, Iri B.; *also see* Monk, Terri G.; *also see* Segal, Ira S.

Wickens, Charles, *see* Raines, Douglas E.

Willaert, Jan, *see* Vertommen, Jan D.

Williams, E. Lynne, Jellish, W. Scott, Modica, Paul A., Eng, Calvin C., Tempelhoff, Rene:
